# Supplementary material for: Synthesis and characterization of new triphenylamino-1,8-naphthalimides for organic light-emitting diode applications
Source: Royal Society of Chemistry journal article supplement (doi:10.1039/c4nj01785d), 2015-01-01
Supplement: c4nj01785d1.pdf [file c4nj01785d1.pdf]

## Supporting Information

### SYNTHESIS AND CHARACTERIZATIONS OF NEW TRIPHENYLAMINO-1,8-NAPHTHALIMIDES FOR ORGANIC LIGHT-EMITTING DIODE APPLICATION

Rungthiwa Arunchai,<sup>a</sup> Taweesak Sudyoadsuk,<sup>b</sup> Narid Prachumrak,<sup>b</sup> Supawadee

Namuangruk,<sup>c</sup> Vinich Promarak,<sup>d</sup> Mongkol Sukwattanasinitt<sup>a</sup> and Paitoon Rashatasakhon,<sup>a\*</sup>

<sup>a</sup> *Organic Synthesis Research Unit, Department of Chemistry, Faculty of Science,*

*Chulalongkorn University, Bangkok, 10330, Thailand*

<sup>b</sup> *Department of Chemistry and Center of Excellence for Innovation in Chemistry, Faculty of*

*Science, Ubon Ratchathani University, Ubon Ratchathani, 34190, Thailand*

<sup>c</sup> *Nanoscale Simulation Laboratory, National Nanotechnology Center (NANOTEC), National*

*Science and Technology Development Agency (NSTDA), Klong Luang, Pathumthani, 12120,*

*Thailand*

<sup>d</sup> *School of Chemistry and Center of Excellence for Innovation in Chemistry, Institute of*

*Science, Suranaree University of Technology, Muang District, Nakorn Ratchasima, 30000,*

*Thailand*

\*E-mail: [paitoon.r@chula.ac.th](mailto:paitoon.r@chula.ac.th)

Tel: 02-218-7620

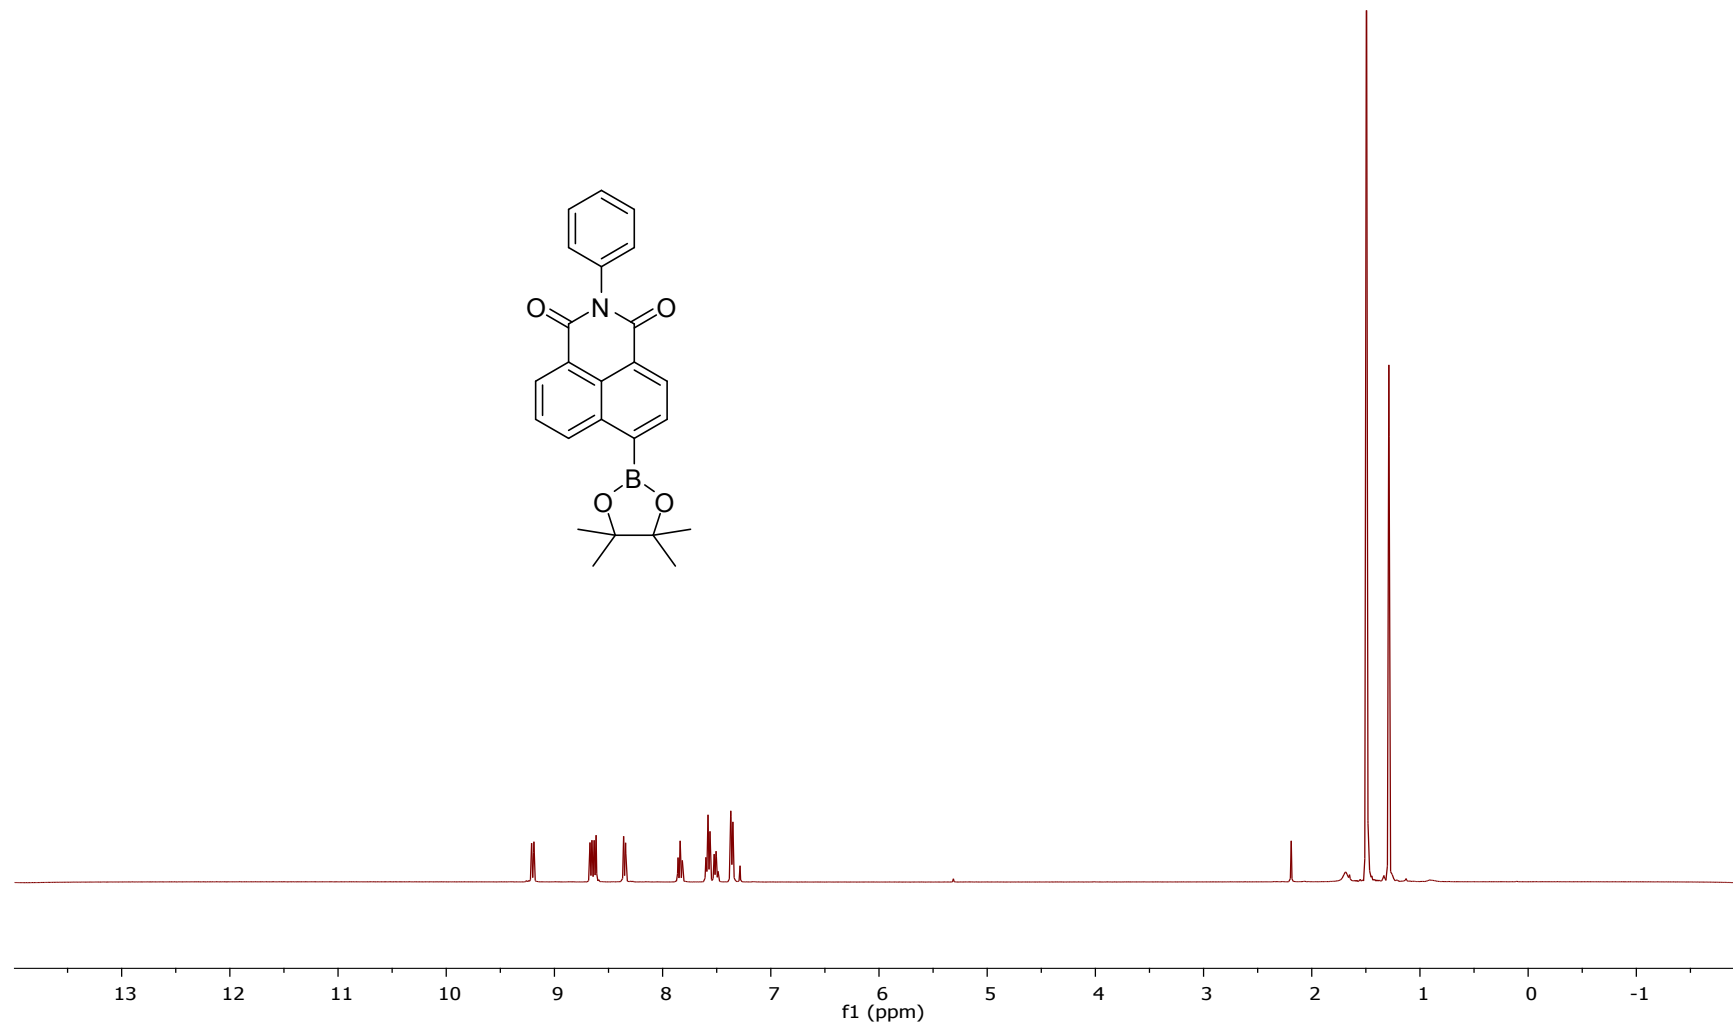

**Fig. S1** <sup>1</sup>H-NMR of A in CDCl<sub>3</sub>

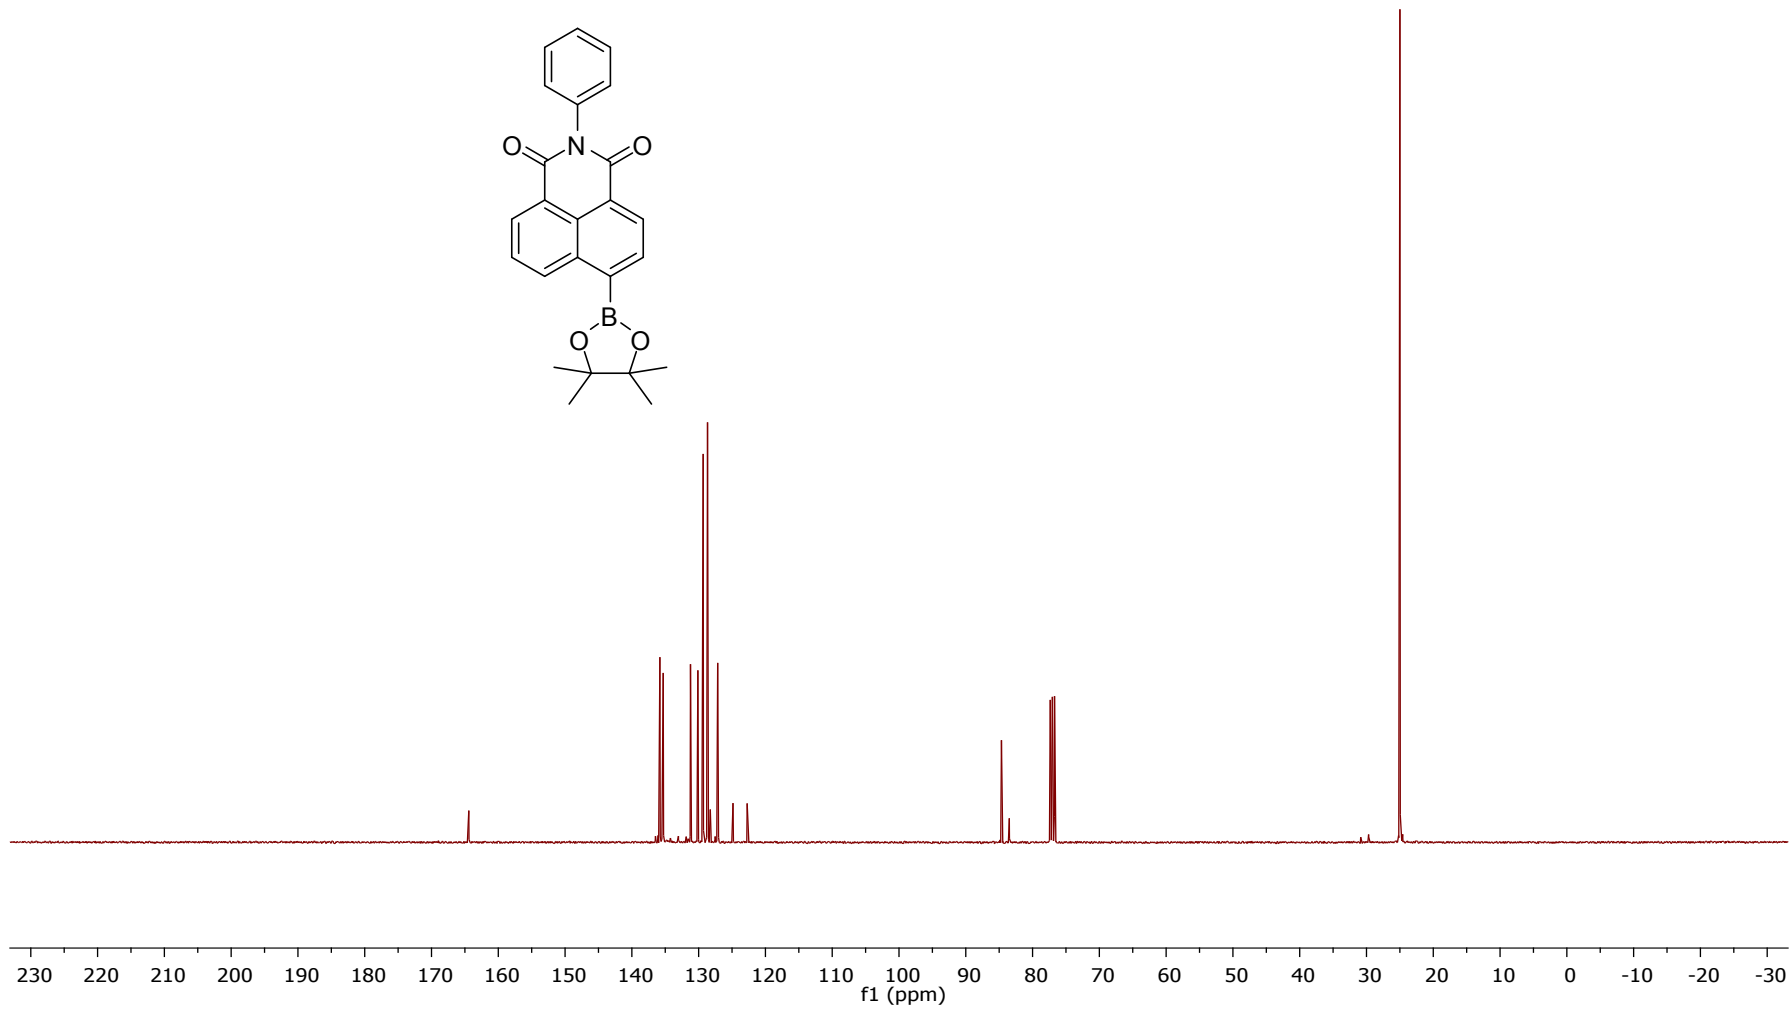

**Fig. S2**  $^{13}\text{C}$ -NMR of A in  $\text{CDCl}_3$

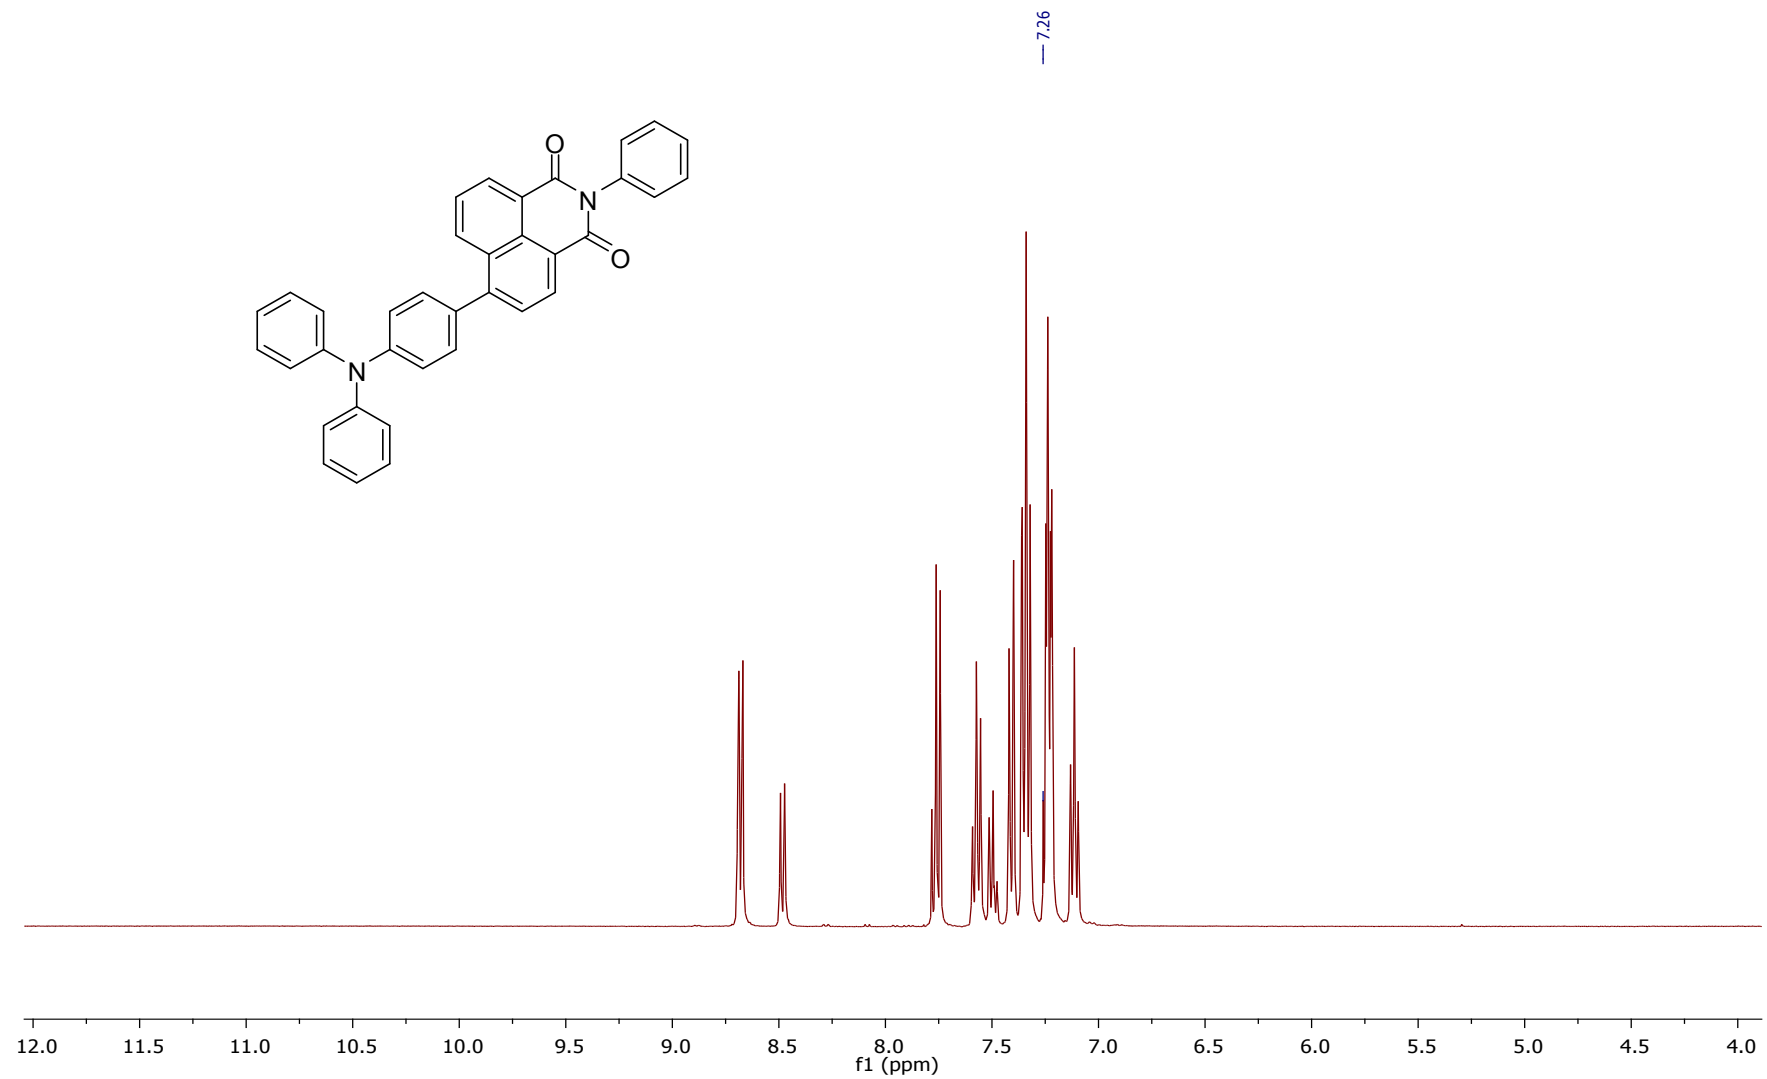

**Fig. S3** <sup>1</sup>H-NMR of TPN1 in CDCl<sub>3</sub>

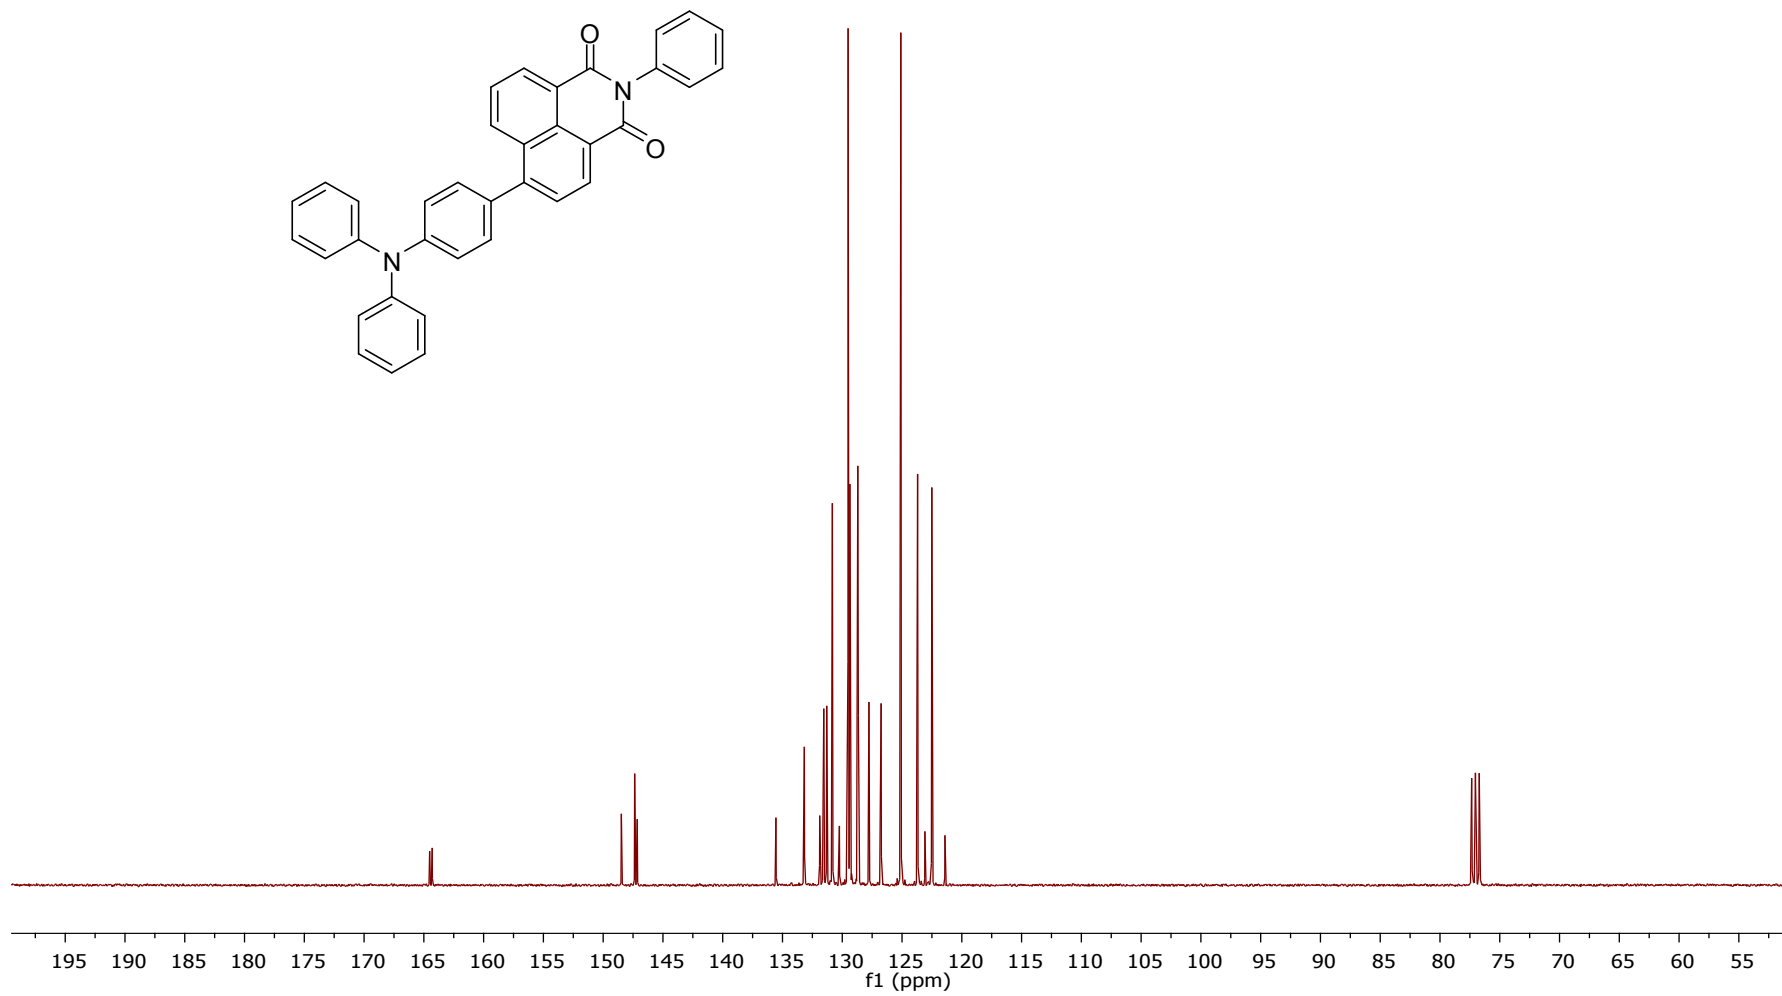

**Fig. S4**  $^{13}\text{C}$ -NMR of TPN1 in  $\text{CDCl}_3$

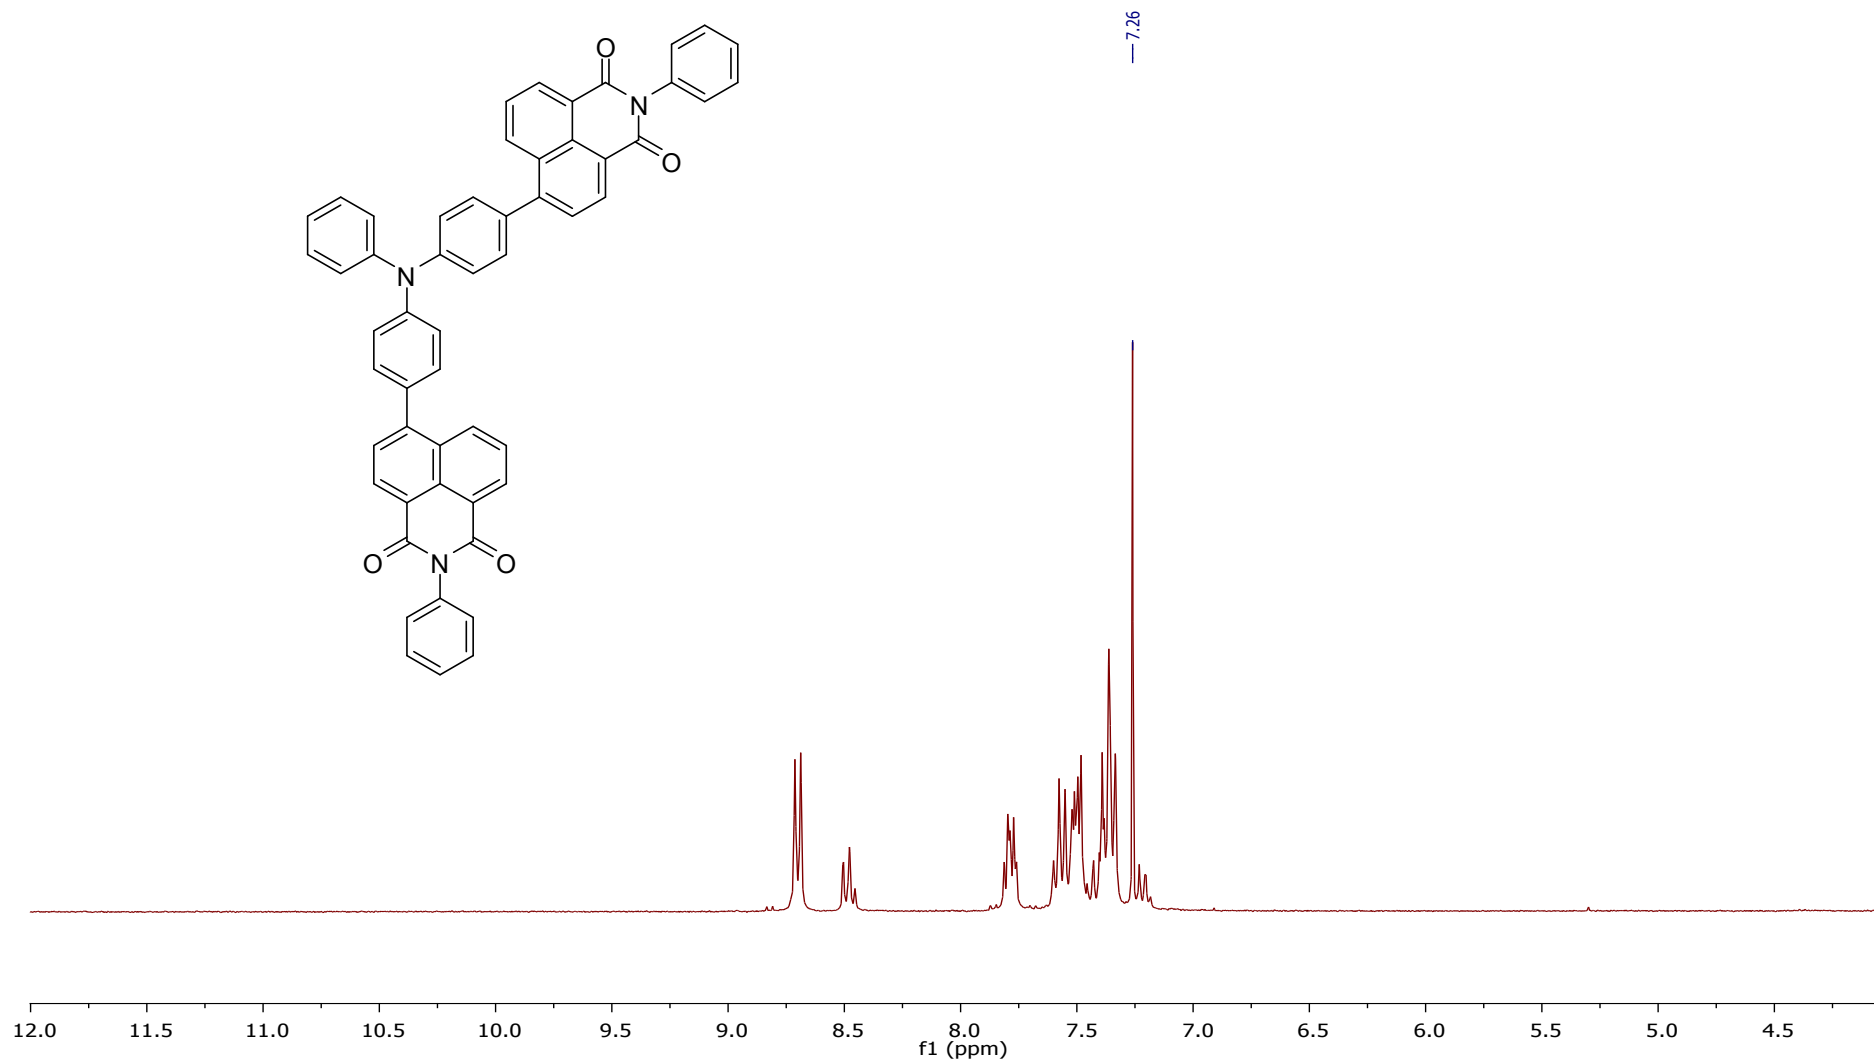

Fig. S5 <sup>1</sup>H-NMR of TPN2 in CDCl<sub>3</sub>

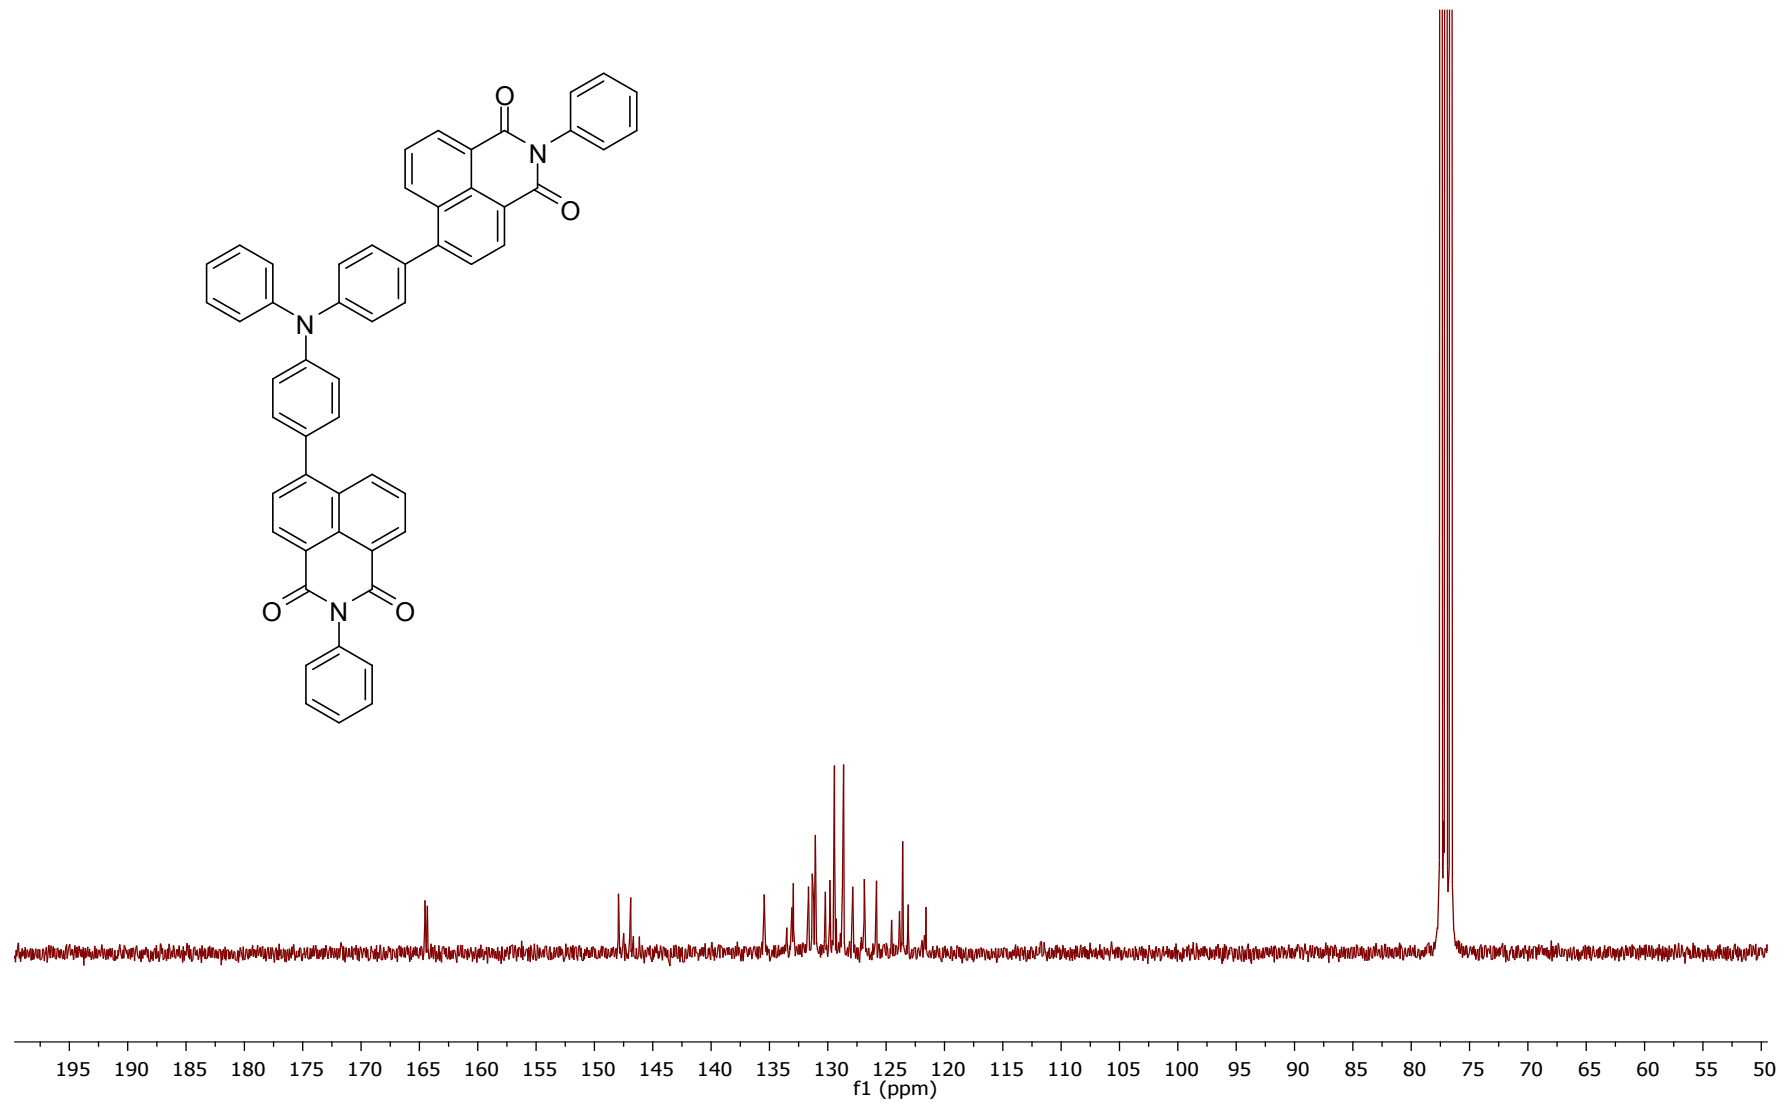

Fig. S6 <sup>13</sup>C-NMR of TPN2 in CDCl<sub>3</sub>

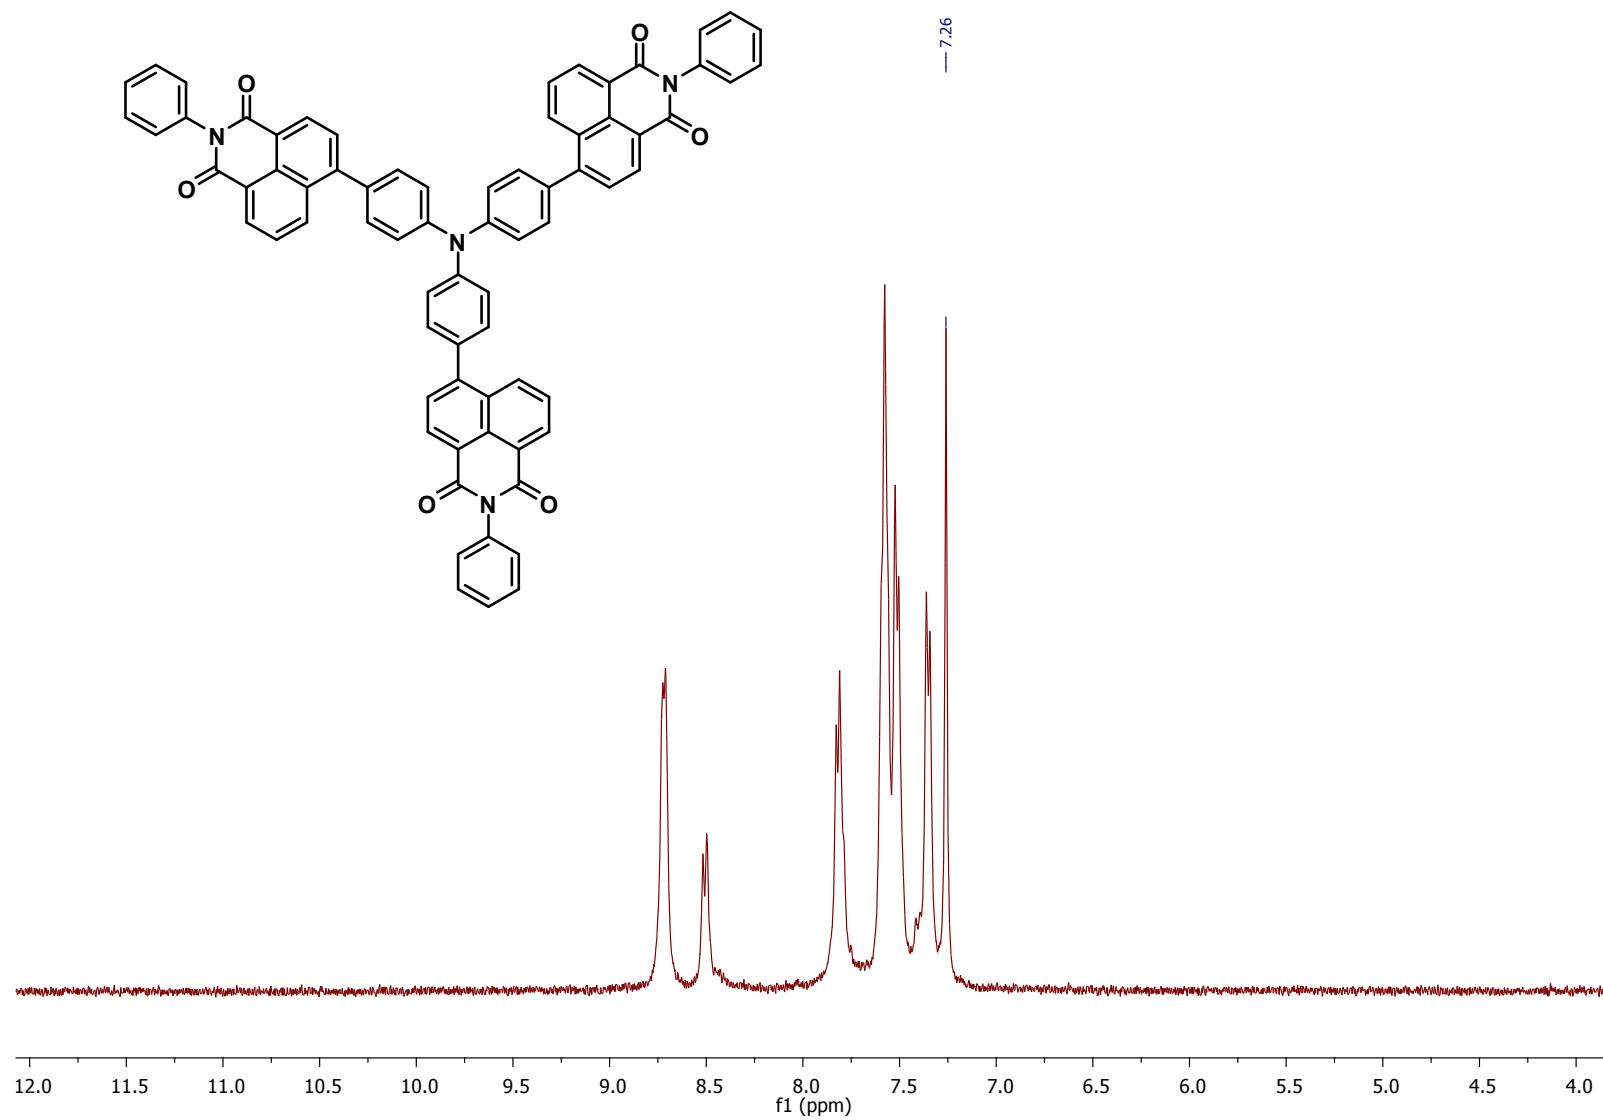

Fig. S7 <sup>1</sup>H-NMR of TPN3 in CDCl<sub>3</sub>



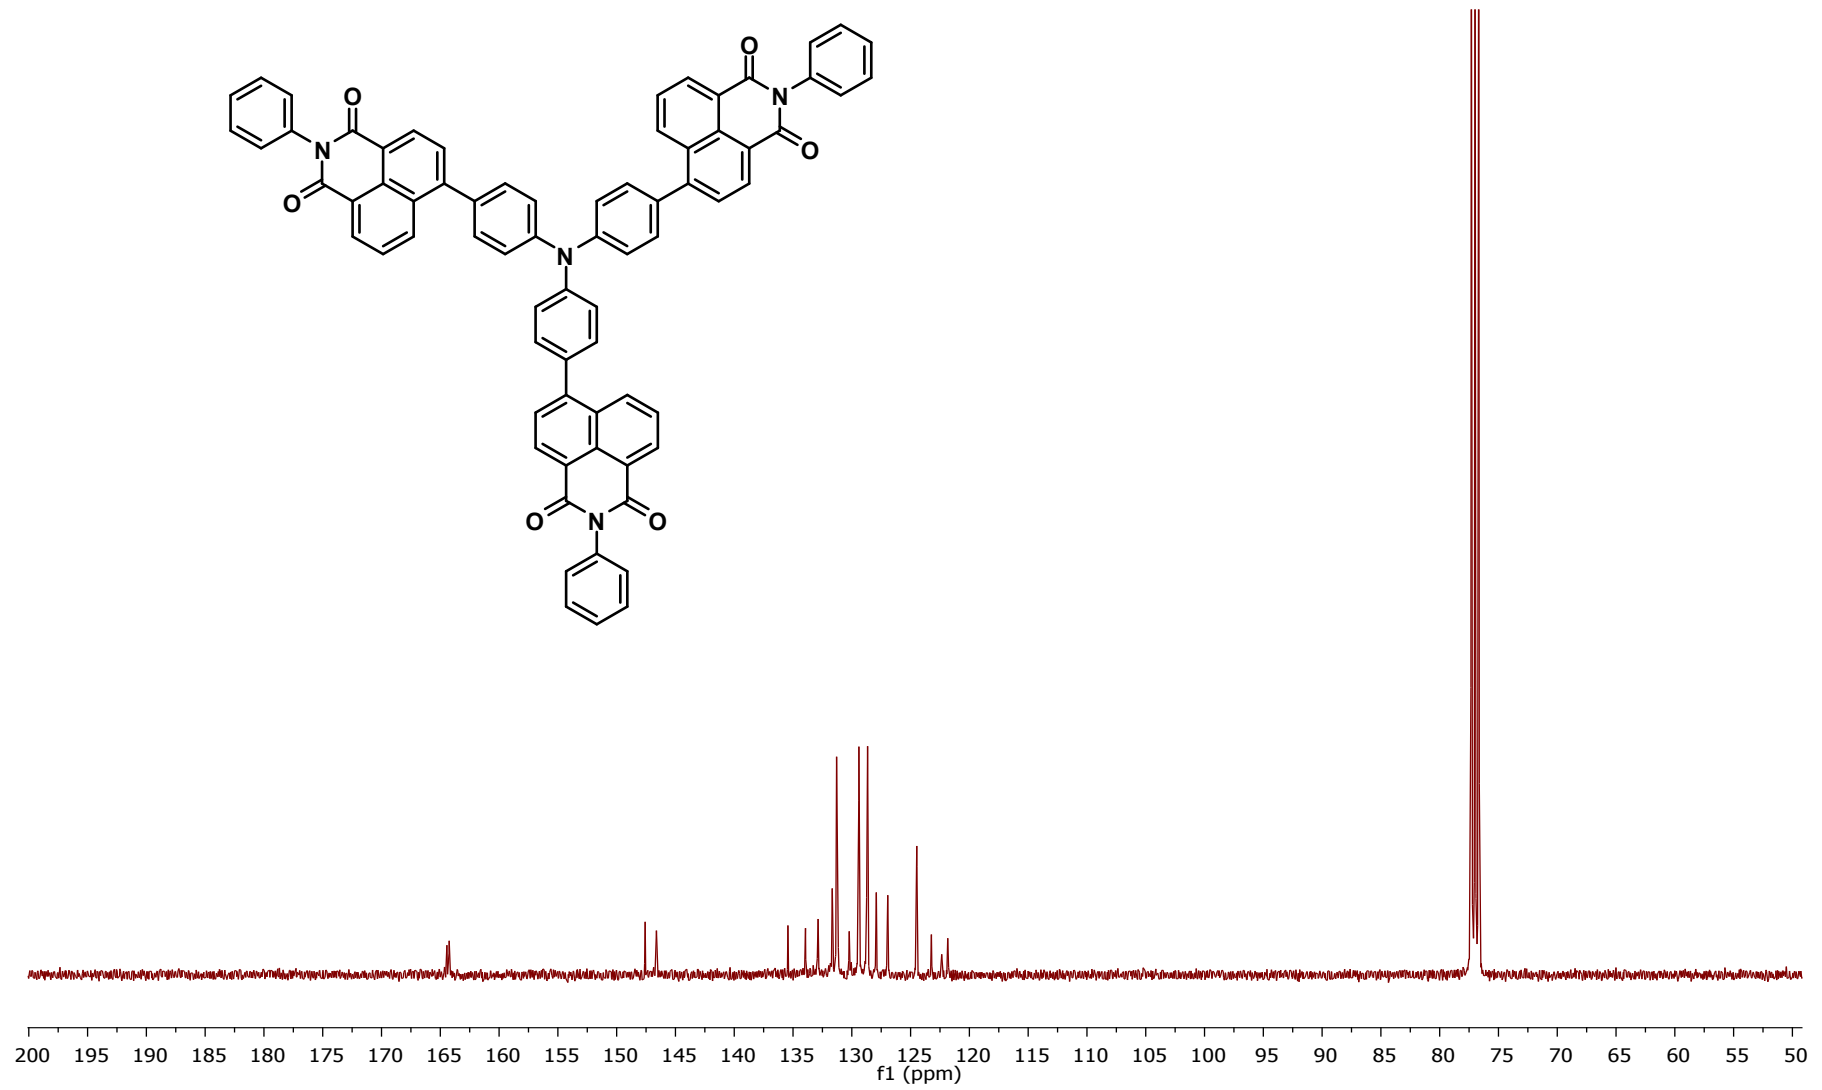

Fig. S8 <sup>13</sup>C-NMR of TPN3 in CDCl<sub>3</sub>
